# Supplementary material
Source: PubMed Central journal article supplement (PMC3748806)
Supplement: NIHMS483093-supplement-02.pdf [file NIHMS483093-supplement-02.pdf]

A

30 month old

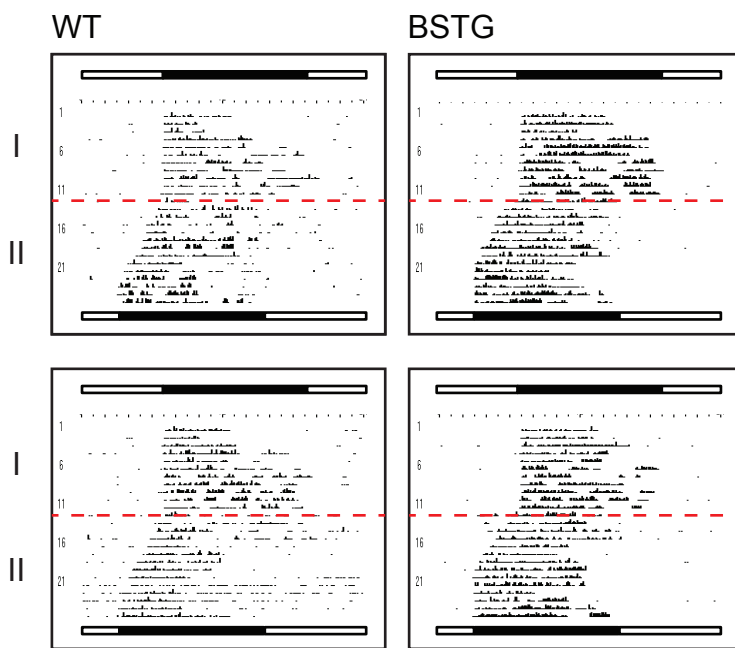

B

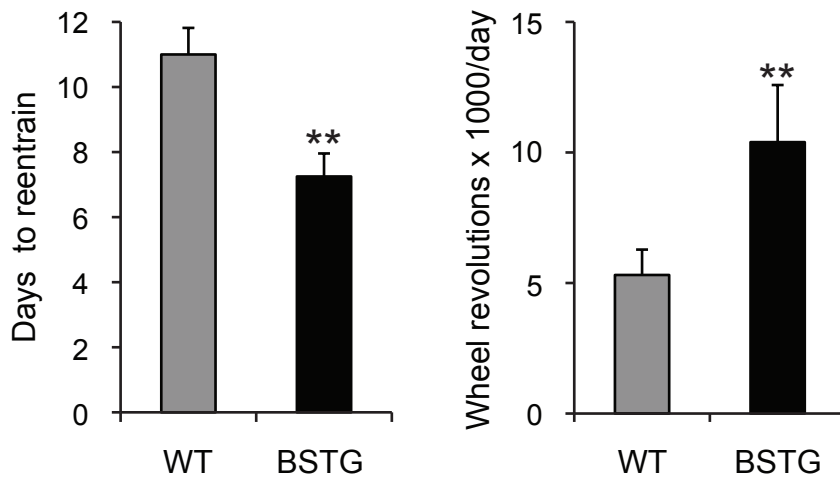

Figure S2

A

22 month old

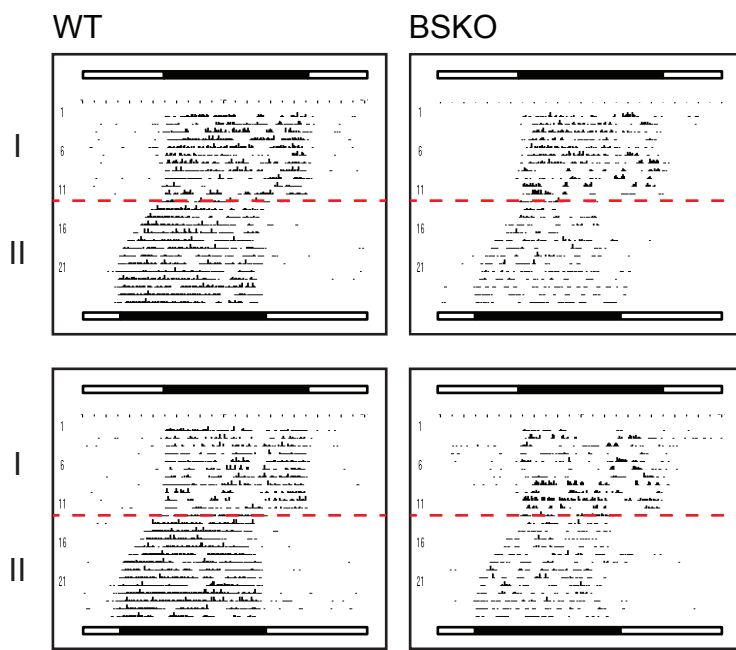

B

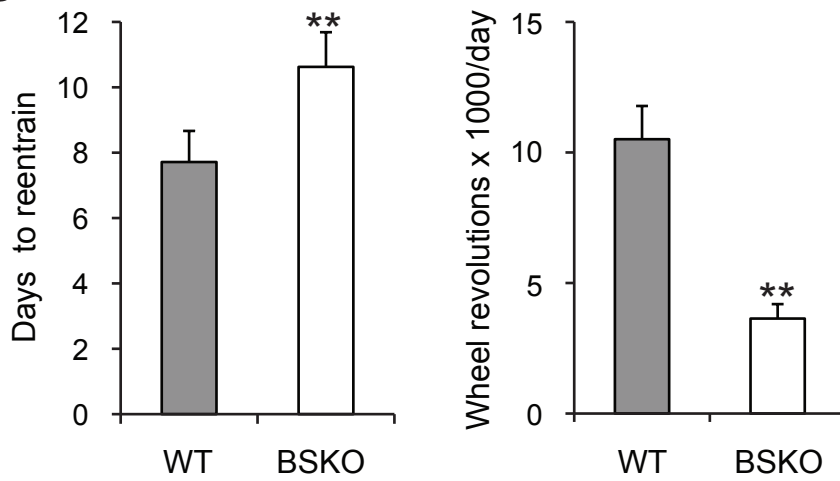

Figure S3

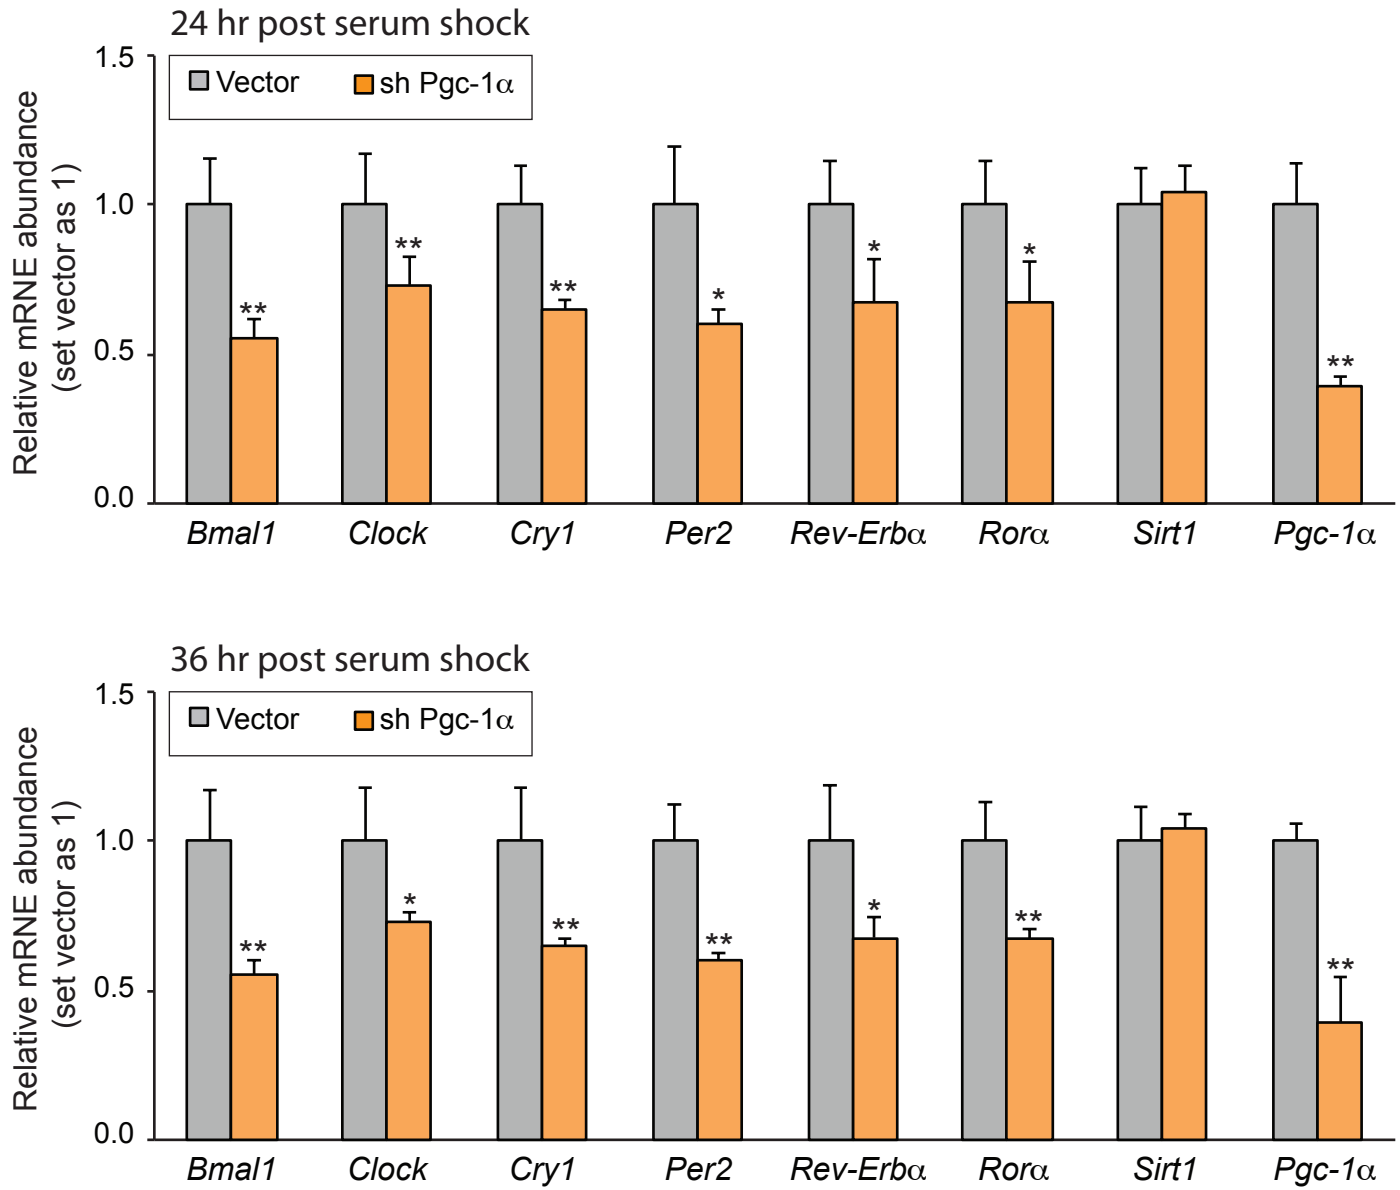

Figure S4

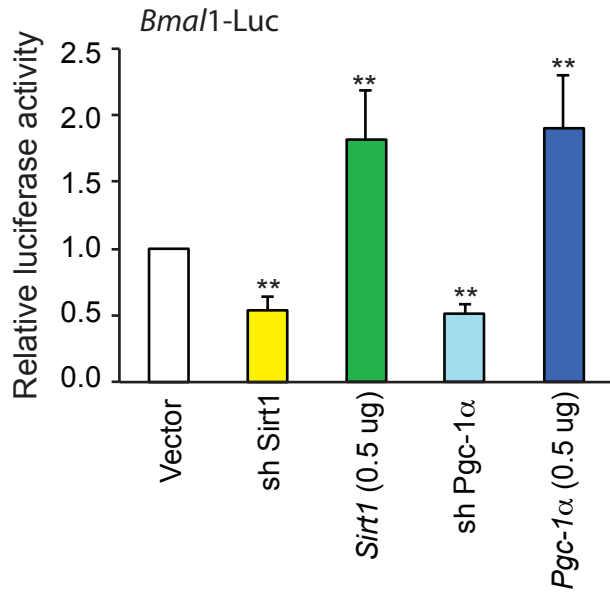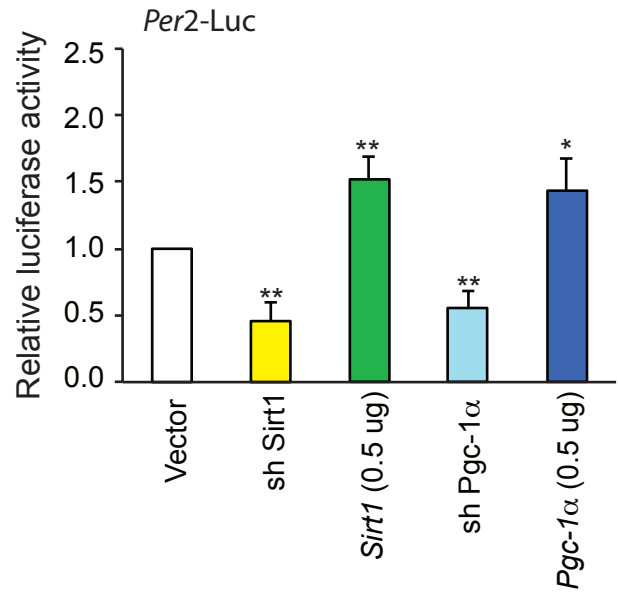

Figure S5

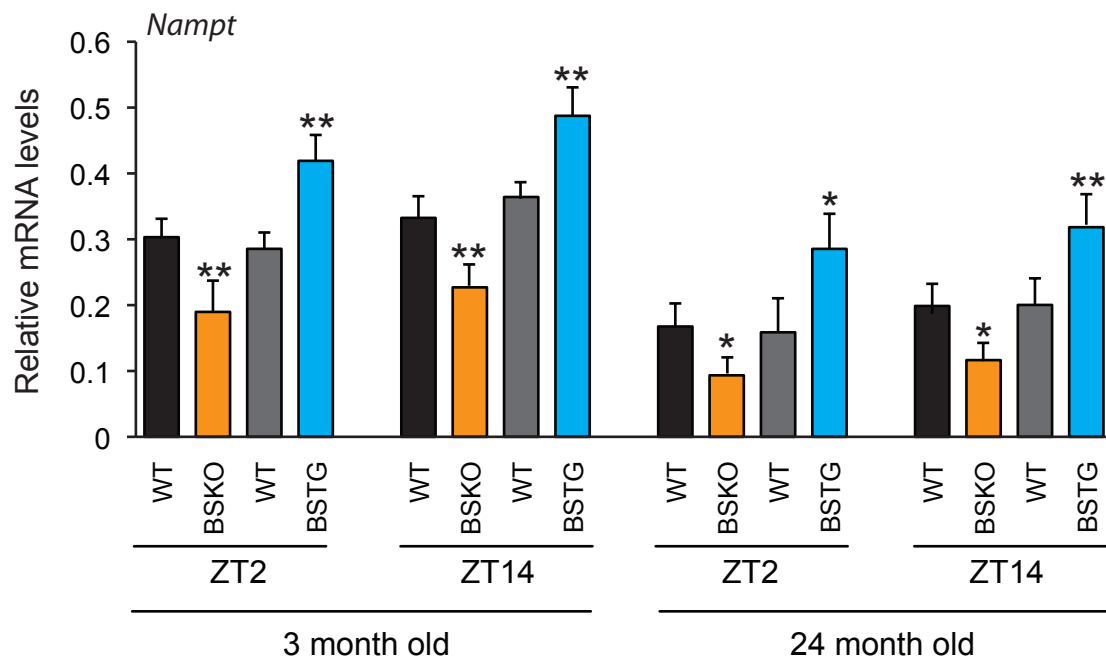

# Table S1

## Primers used for quantitative Real-Time PCR

| Gene            | Forward primer          | Reverse primer          |
|-----------------|-------------------------|-------------------------|
| <i>Bmal1</i>    | 5'-CTTGCAAGCACCTTCCTTCC | 5'-GGGTCATCTTTGTCTGTGTC |
| <i>Clock</i>    | 5'-GAGTTCTGATGGTCAGTCAC | 5'-ACCCAGCTCCTTAATGAGG  |
| <i>Cry1</i>     | 5'-TTCCTCCCTTGAAGCTCTC  | 5'-GAAGCAAAAATCGCCACCTG |
| <i>Per2</i>     | 5'-GCGAAGCGCTTATTCCAGAG | 5'-AGTCTGAAGGCATCATCAGG |
| <i>Rev-Erba</i> | 5'-GCAAATCAGATCTCAGGTGC | 5'-AGGTGATAACACCACCTGTG |
| <i>Rora</i>     | 5'-ACGCCACCTACAACATCTC  | 5'-ACATATGGGTTCCGGTTTGA |
| <i>Sirt1</i>    | 5'-TCTGTCTCCTGTGGGATTCC | 5'-GATGCTGTTGCAAAGGAACC |
| <i>Pgc-1a</i>   | 5'-TCACACCAAACCCACAGAAA | 5'-TCTGGGGTCAGAGGAAGAGA |
| <i>Nampt</i>    | 5'-TACAGTGGCCACAAATTCCA | 5'-AATGAGCAGATGCCCTATG  |
| <i>Rpl19</i>    | 5'-AAGCCTGTGACTGTCCATTC | 5'-CTTCTTGATTCCCGGTATC  |

## Primers used for in situ hybridization constructs

|              | Forward primer           | Reverse primer            |
|--------------|--------------------------|---------------------------|
| <i>Bmal1</i> | 5'-AATTCTCAGGGCAGCAGATGG | 5'-GTGCTGTGGATTGTGCAGAAGC |
| <i>Per2</i>  | 5'-ATGAATGGATACGTGGACTTC | 5'-GATTTCTCCTCCATGCACTCC  |
| <i>Sirt1</i> | 5'-AAAGATAATAGTTCTGACTGG | 5'-TTGTGACACAGAGACGGCTGG  |

## shRNA sequences used in this study

| shRNA                            | Sense sequence         |
|----------------------------------|------------------------|
| <i>Sirt1</i>                     | AAGTTGACCTCCTCATTGTTA  |
| <i>Pgc-1a</i> (Sigma, 2365s21c1) | TAACATATGCAGACCTAGATAC |
| <i>Pgc-1a</i> (Sigma, 2732s21c1) | TCCAGTAAGCACACGTTTATT  |

## Primers used for luciferase reporter constructs

| Promoter     | Primer                                        |
|--------------|-----------------------------------------------|
| <i>Bmal1</i> | Forward: 5'-GTCTCGAGGGGCTACAACAGAACAACACTAACC |
|              | Reverse: 5'-GTAAGCTTGGCTCGCTGCGAGCGCCCGC      |
| <i>Per2</i>  | Forward: 5'-GTGCTAGCTGTAGAGCAAGACAAGAAAAGC    |
|              | Reverse: 5'-GTCTCGAGGCTGCCGCCGCGTCGCCCTCCGC   |

## Primers used for ChIP assay

|       | Forward primer          | Reverse primer          |
|-------|-------------------------|-------------------------|
| Set1  | 5'-ACGCTTGGAGGTCAAGAGAA | 5'-TCCCTCTCCAGCTCCATCTA |
| Set2  | 5'-TTGGGCACAGCGATTGGTGG | 5'-TCCGGCGCGGGTAAACAGG  |
| 3'UTR | 5'-CTGTGTGCATCGGACAGTC  | 5'-CGAAGCCACCATCTGAAAC  |

# Table S2

## Strains used in this study

| Name   | Strain                                     | Paired WT                                    | Background<br>(backcross generation) | Reference/Source                                  |
|--------|--------------------------------------------|----------------------------------------------|--------------------------------------|---------------------------------------------------|
| NesCre | Nes-Cre/+                                  | -                                            | C57BL/6 (-)                          | MIT transgenic core                               |
| BSKO   | Nes-Cre/+; <i>Sirt1</i> <sup>flx/flx</sup> | <i>Sirt1</i> <sup>flx/flx</sup>              | C57BL/6 (>8)                         | Li <i>et al</i> (2007), Cohen <i>et al</i> (2009) |
| BSTG   | Nes-Cre/+; <i>Sirt1</i> <sup>STOP/+</sup>  | <i>Sirt1</i> <sup>STOP/+</sup> and Nes-Cre/+ | C57BL/6 (6)                          | Firestein <i>et al</i> (2008)                     |
| Sir2d  | <i>Sirt1</i> -KI/+                         | +/+                                          | C57BL/6 (>8)                         | Bordone <i>et al</i> (2007)                       |
